# Supplementary material for: In pancreatic cancer, chemotherapy increases antitumor responses to tumor-associated antigens and potentiates DNA vaccination
Source: HighWire-hosted journal article supplement (doi:10.1136/jitc-2020-001071), 2020-10-01
Supplement: jitc-2020-001071supp004_data_supplement.xlsx [file jitc-2020-001071supp004_data_supplement.xlsx]

## Sheet: A_Identified_antigens
Supplementary Table 1A. Proteins recognized by patients’ autoantibodies.
Spot number	Protein entry	Gene entry	ID	Name	MW	pI	Matched peptides/25	Coverage %	Mascot score
1	ENOA_HUMAN	ENO1	Q6GMP2	Alpha-enolase	47481	7.01	10	32	102
2	ENOA_HUMAN	ENO1	Q6GMP2	Alpha-enolase	47481	7.01	13	37	126
3	ENOA_HUMAN	ENO1	Q6GMP2	Alpha-enolase	47481	7.01	12	38	108
4bis	SODM_HUMAN	SOD2	Q5TCM1	Superoxide dismutase [Mn], mitochondrial	24878	8.35	6	40	79
5	TRAF5_HUMAN	TRAF5	O00463	TNF receptor-associated factor 5	65904	7.26	6	13	58
6	ENOA_HUMAN	ENO1	Q6GMP2	Alpha-enolase	47481	7.01	9	29	99
7	LMNA_HUMAN	LMNA	Q5TCJ2	Prelamin-A/C	74380	6.57	8	18	65
8	LMNA_HUMAN	LMNA	Q5TCJ2	Prelamin-A/C	74380	6.57	8	13	62
9	NUCL_HUMAN	NCL	P19338	Nucleolin	76625	4.6	11	19	113
10	GFAP_HUMAN	GFAP	Q7Z5J7	Glial fibrillary acidic protein	49907	5.42	8	15	60
11	RRBP1_HUMAN	RRBP1	Q9H476	Ribosome-binding protein 1	15270	8.69	15	14	121
12	K1C10_HUMAN	KRT10	P13645	Keratin, type I cytoskeletal 10	59020	5.13	8	16	60
13	mixture								75
	PITM3_HUMAN	PITPNM3	Q9BZ71	Membrane-associated phosphatidylinositol transfer protein 3	106714	6.69	9	25	54
	ZN160_HUMAN	ZNF160	Q9HCG1	Zinc finger protein 160	94051	9.44	9	25	52
14	Mixture								124
	TBB5_HUMAN	TUBB	P07437	Tubulin beta chain	50095	4.78	9	32	83
	VIME_HUMAN	VIM	Q8N850	Vimentin	53676	5.06	8	28	76
	ATPB_HUMAN	ATP5B	P06576	ATP synthase subunit beta, mitochondrial	56525	5.26	5	16	40
15	HSP7C_HUMAN	HSPA8	P11142	Heat shock cognate 71 kDa protein	71082	5.37	15	31	164
16	Mixture								134
	TBB5_HUMAN	TUBB	P07437	Tubulin beta chain	50095	4.78	12	38	114
	K2C8_HUMAN	KRT8	Q6DHW5	Keratin, type II cytoskeletal 8	53671	5.52	9	25	73
17	ACTB_HUMAN	ACTB	Q96HG5	Actin, cytoplasmic 1	42052	5.29	6	23	60
	ACTG_HUMAN	ACTG1	P63261	Actin, cytoplasmic 2	42108	5.31	6	23	60
18	PRS10_HUMAN	PSMC6	P62333	26S protease regulatory subunit 10B	44430	7.01	14	42	168
19	AK1BA_HUMAN	AKR1B10	O60218	Aldo-keto reductase family 1 member B10	36225	7.67	6	23	57
20	G3P_HUMAN	GAPDH	P04406	Glyceraldehyde-3-phosphate dehydrogenase	36201	8.57	5	30	66
20bis	Mixture								116
	G3P_HUMAN	GAPDH	P04406	Glyceraldehyde-3-phosphate dehydrogenase	36201	8.57	7	31	84
	ALDOA_HUMAN	ALDOA	P04075	Fructose-bisphosphate aldolase A	39851	8.3	6	21	68
21	TAGL2_HUMAN	TAGLN2	P37802	Transgelin-2	22548	8.41	7	33	81
21bis	EXOSX_HUMAN	EXOSC10	Q01780	Exosome component 10	101566	8.68	7	9	61
22	VIME_HUMAN	VIM	Q8N850	Vimentin	53676	5.06	18	49	230
23	VDAC1_HUMAN	VDAC1	P21796	Voltage-dependent anion-selective channel protein 1	30868	8.62	7	34	88
24	K1C19_HUMAN	KRT19	Q9P1Y4	Keratin, type I cytoskeletal 19	44079	5.04	14	36	169
25	K1C19_HUMAN	KRT19	Q9P1Y4	Keratin, type I cytoskeletal 19	44079	5.04	9	24	99
26	HNRH1_HUMAN	HNRNPH1	P31943	Heterogeneous nuclear ribonucleoprotein H	49484	5.89	7	28	80
28	PHF6_HUMAN	PHF6	Q9BRU0	PHD finger protein 6	42404	8.97	8	28	71
29	UGDH_HUMAN	UGDH	O60701	UDP-glucose 6-dehydrogenase	55674	6.73	15	40	175
30	FUBP1_HUMAN	FUBP1	Q96AE4	Far upstream element-binding protein 1	67690	7.18	7	15	66
31	FUBP1_HUMAN	FUBP1	Q96AE4	Far upstream element-binding protein 1	67518	7.18	25	25	96
32	FUBP1_HUMAN	FUBP1	Q96AE4	Far upstream element-binding protein 1	67690	7.18	17	34	154
33	LMNA_HUMAN	LMNA	Q5TCJ2	Prelamin-A/C	74380	6.57	9	18	72
35	KPYM_HUMAN	PKM	Q96E76	Pyruvate kinase PKM	58470	7.96	12	25	106
36	KPYM_HUMAN	PKM	Q96E76	Pyruvate kinase PKM	58470	7.96	8	16	57
37	HS3S5_HUMAN	HS3ST5	Q8IZT8	Heparan sulfate glucosamine 3-O-sulfotransferase 5	40611	9.8	5	20	58
38	ECHM_HUMAN	ECHS1	P3008	Enoyl-CoA hydratase, mitochondrial	31823	8.34	9	36	111
40	G3P_HUMAN	GAPDH	P04406	Glyceraldehyde-3-phosphate dehydrogenase	36201	8.57	7	26	67
41	Mixture								112
	AK1C2_HUMAN	AKR1C2	P52895	Aldo-keto reductase family 1 member C2	37111	7.13	7	31	74
	AK1BA_HUMAN	AKR1B10	O60218	Aldo-keto reductase family 1 member B10	36225	7.67	7	32	73
42	HNRH3_HUMAN	HNRNPH3	Q9UFU4	Heterogeneous nuclear ribonucleoprotein H3	36960	6.37	8	31	91
43	TPIS_HUMAN	TPI1	P60174	Triosephosphate isomerase	31057	5.65	5	26	60
44	K2C8_HUMAN	KRT8	Q6DHW5	Keratin, type II cytoskeletal 8	53671	5.52	20	37	211
45	PDIA3_HUMAN	PDIA3	P30101	Protein disulfide-isomerase A3	57146	5.98	15	39	185
46	VIME_HUMAN	VIM	Q8N850	Vimentin	53676	5.06	14	35	158
47	TPM4_HUMAN	TPM4	Q9UCS3	Tropomyosin alpha-4 chain	28619	4.67	8	29	77
49	KPYM_HUMAN	PKM	Q96E76	Pyruvate kinase PKM	58470	7.96	17	42	208
50	ATP5H_HUMAN	ATP5H	O75947	ATP synthase subunit d, mitochondrial	18537	5.21	6	38	90
52	PDIA3_HUMAN	PDIA3	P30101	Protein disulfide-isomerase A3	57146	5.98	12	31	131
53	K1C19_HUMAN	KRT19	Q9P1Y4	Keratin, type I cytoskeletal 19	44079	5.04	18	46	242
54	Mixture								110
	ROA2_HUMAN	HNRNPA2B1	P22626	Heterogeneous nuclear ribonucleoproteins A2/B1	37464	8.97	7	35	80
	VDAC2_HUMAN	VDAC2	P45880	Voltage-dependent anion-selective channel protein 2	32060	7.49	6	33	68
55	ENOA_HUMAN	ENO1	Q6GMP2	Alpha-enolase	47481	7.01	8	21	58
56	PDIA3_HUMAN	PDIA3	P30101	Protein disulfide-isomerase A3	57146	5.98	7	16	70
57	AK1C2_HUMAN	AKR1C2	P52895	Aldo-keto reductase family 1 member C2	37111	7.13	8	34	92
58	ETFA_HUMAN	ETFA	P13804	Electron transfer flavoprotein subunit alpha, mitochondrial	35058	8.61	6	29	71
59	PRDX1_HUMAN	PRDX1	Q06830	Peroxiredoxin-1	22324	8.27	6	24	83
60	FGF14_HUMAN	FGF14	Q92915	Fibroblast growth factor 14	27856	10.1	5	22	56
61	LMNA_HUMAN	LMNA	Q5TCJ2	Prelamin-A/C	74380	6.57	9	20	92
62	GRP75_HUMAN	HSPA9	Q9UC56	Stress-70 protein, mitochondrial	73920	5.87	14	25	129
63	PSA1_HUMAN	PSMA1	P25786	Proteasome subunit alpha type-1	29822	6.15	6	30	58
64	Mixture								125
	CH60_HUMAN	HSPD1	P10809	60 kDa heat shock protein, mitochondrial	61187	5.7	12	24	110
	LEG3_HUMAN	LGALS3	P17931	Galectin-3	26193	8.57	5	22	42
66	COF1_HUMAN	CFL1	P23528	Cofilin-1	18719	8.22	5	42	70
67	NDK8_HUMAN	NME2P1	O60361	Putative nucleoside diphosphate kinase	15690	8.76	6	37	72
68	MTAP_HUMAN	MTAP	Q9H010	S-methyl-5'-thioadenosine phosphorylase	31216	6.75	5	27	67
69	IPYR_HUMAN	PPA1	Q15181	Inorganic pyrophosphatase	33095	5.54	10	43	125
70	Mixture								90
	6PGL_HUMAN	PGLS	O95336	6-phosphogluconolactonase	27815	5.7	6	37	66
	ERP29_HUMAN	ERP29	P30040	Endoplasmic reticulum resident protein 29	29032	6.77	8	28	62
71	CLIC1_HUMAN	CLIC1	Q15089	Chloride intracellular channel protein 1	27248	5.09	6	31	74
73	TPIS_HUMAN	TPI1	P60174	Triosephosphate isomerase	31057	5.65	6	24	70
74	TPIS_HUMAN	TPI1	P60174	Triosephosphate isomerase	31057	5.65	6	29	61
75	LASP1_HUMAN	LASP1	Q1484	LIM and SH3 domain protein 1	30097	6.61	10	37	117
77	IDHC_HUMAN	IDH1	O75874	Isocitrate dehydrogenase [NADP] cytoplasmic	46915	6.53	8	27	86
78	GSTO1_HUMAN	GSTO1	P78417	Glutathione S-transferase omega-1	27833	6.23	7	25	85
79	FUBP1_HUMAN	FUBP1	Q96AE4	Far upstream element-binding protein 1	67690	7.18	16	29	139
80	ACY1_HUMAN,	ACY1	Q03154	Aminoacylase-1	46084	5.77	11	45	130
81	PGK1_HUMAN	PGK1	P00558	Phosphoglycerate kinase 1	44985	8.3	8	33	80
82	CH60_HUMAN	HSPD1	P10809	60 kDa heat shock protein, mitochondrial	61187	5.7	12	27	115
83	VIME_HUMAN	VIM	Q8N850	Vimentin	53676	5.06	19	50	228
84	ATPB_HUMAN	ATP5B	P06576	ATP synthase subunit beta, mitochondrial	56525	5.26	11	35	117
85	CBR1_HUMAN	CBR1	P16152	Carbonyl reductase [NADPH] 1	30641	8.55	6	29	66
86	ALDOA_HUMAN	ALDOA	P04075	Fructose-bisphosphate aldolase A	39851	8.3	12	38	141
87	TPIS_HUMAN	TPI1	P60174	Triosephosphate isomerase	31057	5.65	12	48	163
88	PRDX1_HUMAN	PRDX1	Q06830	Peroxiredoxin-1	22324	8.27	12	72	193
89	K2C8_HUMAN	KRT8	Q6DHW5	Keratin, type II cytoskeletal 8	53671	5.52	10	23	74
90	VIME_HUMAN	VIM	Q8N850	Vimentin	53676	5.06	10	31	101
92	PGAM1_HUMAN	PGAM1	P18669	Phosphoglycerate mutase 1	28900	6.67	11	55	141
93	PFD3_HUMAN	VBP1	P61758	Prefoldin subunit 3	22815	6.63	7	31	70
94	ALDOA_HUMAN	ALDOA	P04075	Fructose-bisphosphate aldolase A	39851	8.3	12	38	120
98	ANXA4_HUMAN	ANXA4	P09525	Annexin A4	36088	5.84	9	25	95
99	VIME_HUMAN	VIM	Q8N850	Vimentin	53676	5.06	8	24	74
101	Mixture								90
	EFHD2_HUMAN	EFHD2	Q96C19	EF-hand domain-containing protein D2	26794	5.15	6	30	68
	EF1D_HUMAN	EEF1D	P29692	Elongation factor 1-delta	31217	4.9	5	31	60
102	KPYM_HUMAN	PKM	Q96E76	Pyruvate kinase PKM	58470	7.96	7	19	60
103	ANXA1_HUMAN	ANXA1	P04083	Annexin A1	38918	6.57	10	39	128
104	LMNA_HUMAN	LMNA	Q5TCJ2	Prelamin-A/C	74380	6.57	16	34	182
105	FUBP1_HUMAN	FUBP1	Q96AE4	Far upstream element-binding protein 1	67690	7.18	7	20	64
108	ENOA_HUMAN	ENO1	Q6GMP3	Alpha-enolase	47481	7.01	13	29	115
109	LMNA_HUMAN	LMNA	Q5TCJ2	Prelamin-A/C	74380	6.57	7	15	58
110	SHOT1_HUMAN	SHTN1	B7Z7Z9	Shootin-1	72109	5.27	8	13	57
111	ENOA_HUMAN	ENO1	Q6GMP3	Alpha-enolase	47481	7.01	13	29	115
113	HNRPL_HUMAN	HNRNPL	P14866	Heterogeneous nuclear ribonucleoprotein L	64720	8.46	14	23	130
115	KPYM_HUMAN	PKM	Q96E76	Pyruvate kinase PKM	58470	7.96	16	39	185
116	PDIA3_HUMAN	PDIA3	P30101	Protein disulfide-isomerase A3	57146	5.98	14	30	131
117	TCPB_HUMAN	CCT2	P78371	T-complex protein 1 subunit beta	57794	6.01	14	35	135
118	K2C1_HUMAN	KRT1	P04264	Keratin, type II cytoskeletal 1	66170	8.15	9	18	72
119	HNRH1_HUMAN	HNRNPH1	P31943	Heterogeneous nuclear ribonucleoprotein H	49484	5.89	12	43	131
120	PCBP1_HUMAN	PCBP1	Q15365	Poly(rC)-binding protein 1	37987	6.66	7	25	61
121	LASP1_HUMAN	LASP1	Q14847	LIM and SH3 domain protein 1	30097	6.61	12	40	131
122	KPYM_HUMAN	PKM	Q96E76	Pyruvate kinase PKM	58470	7.96	12	32	116
123	IMDH2_HUMAN	IMPDH2	P12268	Inosine-5'-monophosphate dehydrogenase 2	56226	6.44	13	33	176
124	SCOT1_HUMAN	OXCT1	P55809	Succinyl-CoA:3-ketoacid coenzyme A transferase 1, mitochondrial	56578	7.14	10	26	109
125	AL1A1_HUMAN	ALDH1A1	P00352	Retinal dehydrogenase 1	55454	6.3	6	13	61
126	EMC8_HUMAN	EMC8	O43402	ER membrane protein complex subunit 8	24214	5.92	9	46	89
127	IDHC_HUMAN	IDH1	O75874	Isocitrate dehydrogenase [NADP] cytoplasmic	46915	6.53	11	34	117
128	IDHC_HUMAN	IDH1	O75874	Isocitrate dehydrogenase [NADP] cytoplasmic	46915	6.53	9	22	78
129	Mixture								163
	IPYR_HUMAN	PPA1	Q15181	Inorganic pyrophosphatase	33095	5.54	8	32	95
	ANXA3_HUMAN	ANXA3	P12429	Annexin A3	36524	5.63	9	33	94
130	GRP75_HUMAN	HSPA9	Q9UC56	Stress-70 protein, mitochondrial	73920	5.87	14	22	120
131	SNX8_HUMAN	SNX8	Q9Y5X2	Sorting nexin-8	52935	6.96	6	16	57
132	AN32A_HUMAN	ANP32A	P39687	Acidic leucine-rich nuclear phosphoprotein 32 family member A	28682	3.99	6	22	87
135	ANXA1_HUMAN	ANXA1	P04083	Annexin A1	38918	6.57	8	30	85
137	Mixture								152
	CALR_HUMAN	CALR	P27797	Calreticulin	48283	4.29	11	24	137
	CI066_HUMAN	C9orf66	Q5T8R8	Uncharacterized protein C9orf66	31394	11.8	5	22	47
139	SRSF1_HUMAN	SRSF1	Q07955	Serine/arginine-rich splicing factor 1	27842	10.4	7	26	85
140	Mixture								103
	TBB5_HUMAN	TUBB	P07437	Tubulin beta chain	50095	4.78	10	23	86
	IPYR_HUMAN	PPA1	Q15181	Inorganic pyrophosphatase	33095	5.54	5	23	49
141	K1C19_HUMAN	KRT19	Q9P1Y4	Keratin, type I cytoskeletal 19	44079	5.04	11	27	114
142	VIME_HUMAN	VIM	Q8N850	Vimentin	53676	5.06	14	37	146
143	Mixture								120
	K2C8_HUMAN	KRT8	Q6DHW5	Keratin, type II cytoskeletal 8	53671	5.52	11	21	92
	ACTB_HUMAN	ACTB	Q96HG	Actin, cytoplasmic 1	42052	5.29	6	26	56
	ACTG_HUMAN	ACTG1	P63261	Actin, cytoplasmic 2	42108	5.31	6	26	56
144	Mixture								143
	PRDX1_HUMAN	PRDX1	Q06830	Peroxiredoxin-1	22324	8.27	8	53	103
	BLVRB_HUMAN	BLVRB	P30043	Flavin reductase (NADPH)	22219	7.13	9	56	91
145	KPYM_HUMAN	PKM	Q96E76	Pyruvate kinase PKM	58470	7.96	6	17	60
146	AMPL_HUMAN	LAP3	P28838	Cytosol aminopeptidase	56530	8.03	15	32	161
147	ENOA_HUMAN	ENO1	Q6GMP2	Alpha-enolase	47481	7.01	7	20	58
148	SODM_HUMAN	SOD2	Q5TCM1	Superoxide dismutase [Mn], mitochondrial	24878	8.35	6	27	89
150	XXLT1_HUMAN	XXYLT1	Q8NBI6	Xyloside xylosyltransferase 1	44235	8.35	6	18	60
151	ATPA_HUMAN	ATP5A1	Q96IR6	ATP synthase subunit alpha, mitochondrial	59828	9.16	13	28	140
152	KPYM_HUMAN	PKM	Q96E76	Pyruvate kinase PKM	58470	7.96	14	30	129
153	KPYM_HUMAN	PKM	Q96E76	Pyruvate kinase PKM	58470	7.96	16	44	176
156	G3P_HUMAN	GAPDH	P04406	Glyceraldehyde-3-phosphate dehydrogenase	36201	8.57	5	20	61
158	PPIA_HUMAN	PPIA	Q9BTY9	Peptidyl-prolyl cis-trans isomerase A	18229	7.68	9	60	97
159	PPIA_HUMAN	PPIA	Q9BTY9	Peptidyl-prolyl cis-trans isomerase A	18229	7.68	10	67	115
160	PPIA_HUMAN	PPIA	Q9BTY9	Peptidyl-prolyl cis-trans isomerase A	18229	7.68	7	60	104
161	PGK1_HUMAN	PGK1	P00558	Phosphoglycerate kinase 1	44985	8.3	7	24	79
169	TPIS_HUMAN	TPI1	P60174	Triosephosphate isomerase	31057	5.65	12	43	166
172	HNRH1_HUMAN	HNRNPH1	P31943	Heterogeneous nuclear ribonucleoprotein H	49484	5.89	7	22	60
175	KPYM_HUMAN	PKM	Q96E76	Pyruvate kinase PKM	58470	7.96	13	35	140
176	KPYM_HUMAN	PKM	Q96E76	Pyruvate kinase PKM	58470	7.96	11	30	117
177	ANXA5_HUMAN	ANXA5	P08758	Annexin A5	35971	4.94	7	29	67
185	GRP78_HUMAN	HSPA5	P11021	78 kDa glucose-regulated protein	72402	5.07	13	26	128
186	GRP78_HUMAN	HSPA5	P11021	78 kDa glucose-regulated protein	72402	5.07	10	21	114
187	VIME_HUMAN	VIM	Q8N850	Vimentin	53676	5.06	20	45	259
188	K2C8_HUMAN	KRT8	Q6DHW5	Keratin, type II cytoskeletal 8	53671	5.52	14	26	127
189	HSP7C_HUMAN	HSPA8	P11142	Heat shock cognate 71 kDa protein	71082	5.37	14	28	151
190	RNS13_HUMAN	RNASE13	Q5GAN3	Probable inactive ribonuclease-like protein 13	18289	8.87	5	35	63
196	G3P_HUMAN	GAPDH	P04406	Glyceraldehyde-3-phosphate dehydrogenase	36201	8.57	8	28	88
197	ACTB_HUMAN	ACTB	Q96HG5	Actin, cytoplasmic 1	42052	5.29	10	29	111
	ACTG_HUMAN	ACTG1	P63261	Actin, cytoplasmic 2	42108	5.31	10	29	111
199	GSTP1_HUMAN	GSTP1	P09211	Glutathione S-transferase P	23569	5.43	6	39	76
200	ENOA_HUMAN	ENO1	Q6GMP2	Alpha-enolase	47481	7.01	10	22	81
203	LMNA_HUMAN	LMNA	Q5TCJ2	Prelamin-A/C	74380	6.57	15	25	145
204	K1C9_HUMAN	KRT9	P35527	Keratin, type I cytoskeletal 9	62255	5.14	8	20	69
206	K1C10_HUMAN	KRT10	P13645	Keratin, type I cytoskeletal 10	59020	5.13	7	16	66
207	VIME_HUMAN	VIM	Q8N850	Vimentin	53676	5.06	14	37	176
209	VIME_HUMAN	VIM	Q8N850	Vimentin	53676	5.06	15	39	174
210	VIME_HUMAN	VIM	Q8N850	Vimentin	53676	5.06	10	29	90
211	K1C10_HUMAN	KRT10	P13645	Keratin, type I cytoskeletal 10	59020	5.13	6	14	56
The spot number was defined according to spot positions in 2-DE in Supplementary Figure 1C. Accession number according to Swiss Prot database (ID), molecular weight (MW), isoelectric point (pI), number of matched peptides on number of total mass values searched, sequence coverage and Mascot score are indicated for each identified protein.

## Sheet: B_Highly_recognized_TAA
Supplementary Table 1B. TAA recognized frequences by at least seven PDA patients before and after CT.
	TAA recognition frequences
Protein	before CT	after CT
ENO1	17/28	20/28
KPYM	12/28	17/28
G3P	11/28	12/28
VIME	8/28	12/28
PDIA3	8/28	9/28
FUBP1	7/28	8/28
K1C19	7/28	8/28
K2C8	7/28	6/28
LMNA	8/28	5/28
UGDH	5/28	8/28
HNRPL	1/28	7/28
