# Supplementary material for: In pancreatic cancer, chemotherapy increases antitumor responses to tumor-associated antigens and potentiates DNA vaccination
Source: PubMed Central journal article supplement — J Immunother Cancer. 2020 Oct 28;8(2):e001071. doi: 10.1136/jitc-2020-001071 (PMC7594541; doi:10.1136/jitc-2020-001071), 2020-10-28
Supplement: jitc-2020-001071supp005.pdf [file jitc-2020-001071supp005.pdf]

**A**

**untreated**

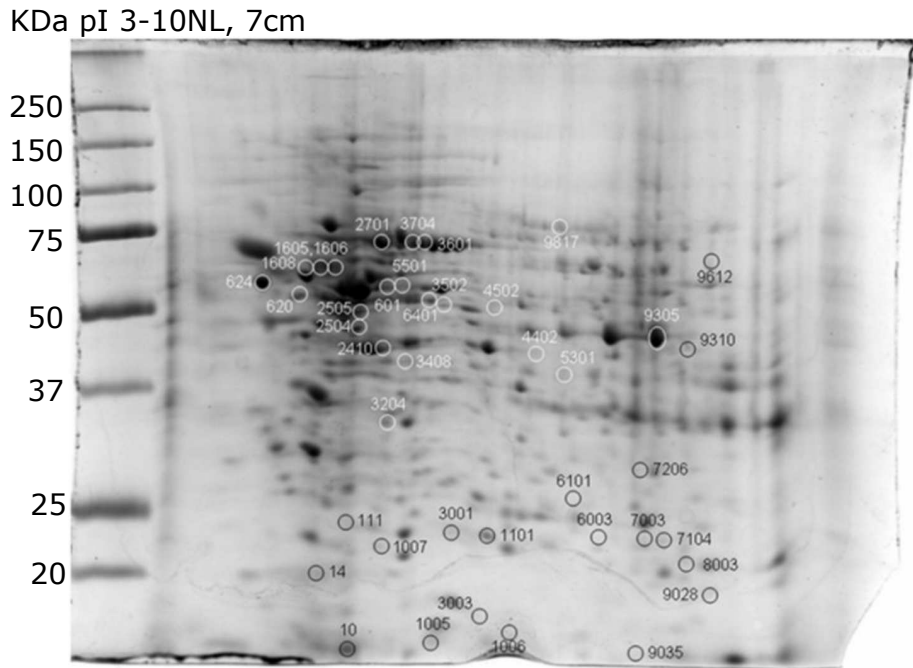

**treated**

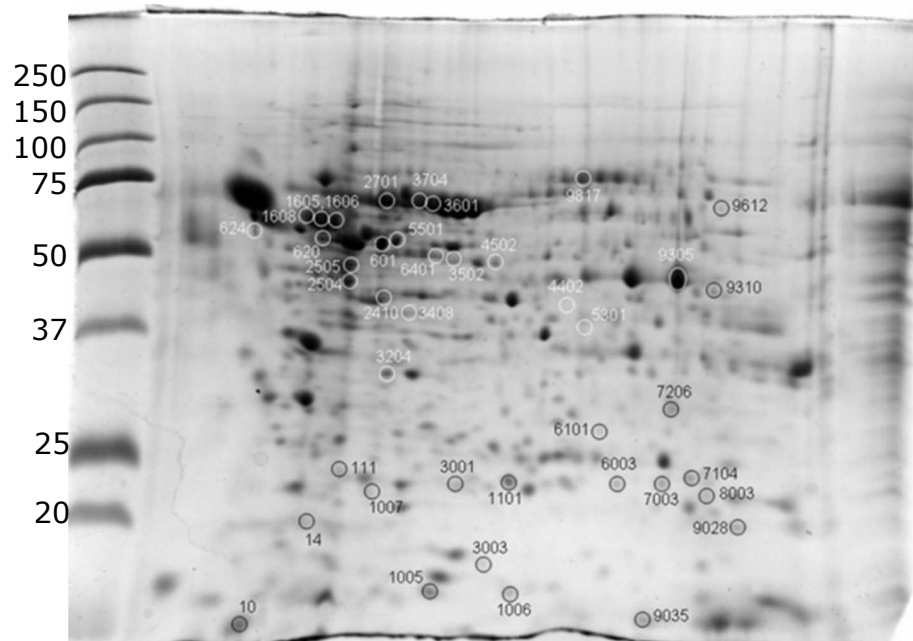

**B**

Number of antigens whose autoantibody recognition increased after CT

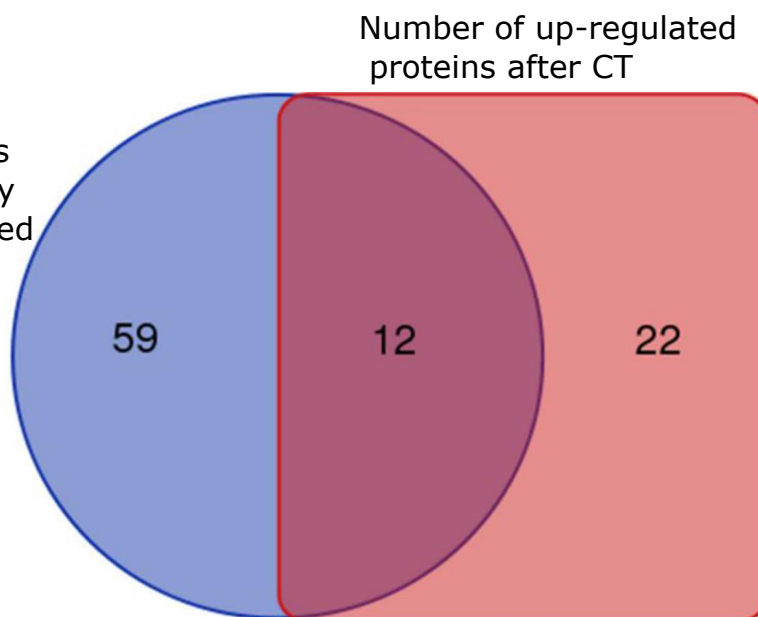

Number of up-regulated proteins after CT

**Common proteins**

- K2C1
- IPYR
- HSP7C
- ACTB/ACTG
- HNRH1
- K1C10
- K1C19
- VIME
- FUBP1
- K2C8
- ATPA
- ENO1
