# Supplementary material for: In pancreatic cancer, chemotherapy increases antitumor responses to tumor-associated antigens and potentiates DNA vaccination
Source: HighWire-hosted journal article supplement (doi:10.1136/jitc-2020-001071), 2020-10-01
Supplement: jitc-2020-001071supp006_data_supplement.xlsx [file jitc-2020-001071supp006_data_supplement.xlsx]

## Sheet: DifferentiallyExpressedProteins
Supplementary Table 2. Differentially expressed proteins after gemcitabine treatment.
Spot number	Protein entry	ID	Name	MW	pI	Matched peptides/25	Coverage %	Mascot score	ratio treated/ untreated	p value
10	MYL6_HUMAN	P60660	Myosin light polypeptide 6	17090	4.56	6	41	67	24.29	0.009
14	FDFT_HUMAN	P37268	Squalene synthase	48597	6.1	7	22	59	3.09	0.028
111	LEKR1_HUMAN	Q6ZMV7	Leucine-, glutamate- and lysine-rich protein 1	45302	6.29	9	23	85	2.84	0.035
601	VIME_HUMAN	Q8N850	Vimentin	53676	5.06	11	32	114	4.38	0.014
620	VIME_HUMAN	Q8N850	Vimentin	53676	5.06	14	37	122	0.16	0.021
624	CALR_HUMAN	P27797	Calreticulin	48283	4.29	5	23	62	0.22	0.037
1005	STMN1_HUMAN	P16949	Stathmin	17292	5.76	6	43	58	2.66	0.018
1006	K2C1_HUMAN	P04264	Keratin, type II cytoskeletal 1	66170	8.15	9	22	86	5.61	0.036
1007	CI116_HUMAN	Q5BN46	UPF0691 protein C9orf116	15535	9.06	4	46	61	2.1	0.024
1101	CC168_HUMAN	Q8NDH2	Coiled-coil domain-containing protein 168	279603	9.35	13	6	57	1.72	0.037
1605	mixture							102	2.54	0.014
	K1C10_HUMAN	P13645	Keratin, type I cytoskeletal 10	59020	5.13	10	20	86
	TRI23_HUMAN	P36406	E3 ubiquitin-protein ligase TRIM23	65508	5.93	6	15	50
1606	VIME_HUMAN	Q8N850	Vimentin	53676	5.06	14	36	146	5.74	0.037
1608	SQSTM_HUMAN	Q13501	Sequestosome-1	48455	5.1	8	34	87	5.25	0.007
2410	ACTB_HUMAN	Q96HG5	Actin, cytoplasmic 1	42052	5.29	6	25	60	6.49	0.015
	ACTG_HUMAN	P63261	Actin, cytoplasmic 2	42108	5.31	6	25	60
2504	HNRPF_HUMAN	P52597	Heterogeneous nuclear ribonucleoprotein F	45985	5.38	12	38	130	3.25	0.022
2505	HNRPF_HUMAN	P52597	Heterogeneous nuclear ribonucleoprotein F	45985	5.38	11	33	112	2.95	0.002
2701	HSP7C_HUMAN	P11142	Heat shock cognate 71 kDa protein	71082	5.37	10	23	84	4.83	0.017
3001	PARK7_HUMAN	Q99497	Protein deglycase DJ-1	20050	6.33	11	48	105	2.05	0.018
3003	ERH_HUMAN	P84090	Enhancer of rudimentary homolog	12422	5.63	4	40	62	2.43	0.019
3204	IPYR_HUMAN	Q15181	Inorganic pyrophosphatase	33095	5.54	6	30	88	2.01	0.039
3408	K1C19_HUMAN	Q9P1Y4	Keratin, type I cytoskeletal 19	44079	5.04	15	37	169	2.24	0.031
3502	HNRH1_HUMAN	P31943	Heterogeneous nuclear ribonucleoprotein H	49484	5.89	10	26	95	2.6	0.01
3601	LR74A_HUMAN	Q0VAA2	Leucine-rich repeat-containing protein 74A	54899	5.22	7	16	60	4.52	0.019
3704	HSP7C_HUMAN	P11142	Heat shock cognate 71 kDa protein	71082	5.37	12	26	125	41.6	0.04
4402	K2C1_HUMAN	P04264	Keratin, type II cytoskeletal 1	66170	8.15	8	15	72	0.13	0.045
4502	HNRH2_HUMAN	P55795	Heterogeneous nuclear ribonucleoprotein H2	49517	5.89	11	25	80	2.33	0.047
5301	PKHH1_HUMAN	Q9ULM0	Pleckstrin homology domain-containing family H member 1	200000	8.17	10	11	60	3.37	0.018
5501	VIME_HUMAN	Q8N850	Vimentin	53676	5.06	16	35	156	2.55	0.026
6003	MCM6_HUMAN	Q14566	DNA replication licensing factor MCM6	93801	5.29	9	13	60	2.03	0.02
6101	PSMD9_HUMAN	O00233	26S proteasome non-ATPase regulatory subunit 9	24838	6.46	7	26	78	13.74	0.001
6401	K2C8_HUMAN	Q6DHW5	Keratin, type II cytoskeletal 8	53671	5.52	10	23	82	1.75	0.002
7003	PSA2_HUMAN	P25787	Proteasome subunit alpha type-2	25996	6.92	8	35	82	2.11	0.021
7104	RAN_HUMAN	P62826	GTP-binding nuclear protein Ran	24579	7.01	6	25	76	2.65	0.029
7206	K2C1_HUMAN	P04264	Keratin, type II cytoskeletal 1	66170	8.15	7	14	59	4.33	0.019
8003	K22E_HUMAN	P35908	Keratin, type II cytoskeletal 2 epidermal	65678	8.07	9	23	81	1.95	0.055
9028	PEBP1_HUMAN	P30086	Phosphatidylethanolamine-binding protein 1	21158	7.01	6	45	75	6.39	0.022
9035	PPIA_HUMAN	P62937	Peptidyl-prolyl cis-trans isomerase A	18229	7.68	8	32	62	11.19	0.004
9305	ENOA_HUMAN	Q6GMP2	Alpha-enolase	47481	7.01	16	38	201	1.92	0.042
9310	FUMH_HUMAN	P07954	Fumarate hydratase, mitochondrial	54773	8.85	8	20	87	1.96	0.026
9612	ATPA_HUMAN	Q96IR6	ATP synthase subunit alpha, mitochondrial	59828	9.16	13	28	140	7.11	0.053
9817	FUBP1_HUMAN	Q96AE4	Far upstream element-binding protein 1	67690	7.18	7	20	64	5.02	0.009
The spot number was defined according to spot positions in 2-DE in Supplementary Figure 1C. Accession number according to Swiss Prot database (ID), molecular weight (MW), isoelectric point (pI), number of matched peptides on number of total mass values searched, sequence coverage, Mascot score, ratio between level of expression in treated and untreated cells and p-values were indicated for each i…
