# Supplementary material for: In pancreatic cancer, chemotherapy increases antitumor responses to tumor-associated antigens and potentiates DNA vaccination
Source: HighWire-hosted journal article supplement (doi:10.1136/jitc-2020-001071), 2020-10-01
Supplement: jitc-2020-001071supp010_data_supplement.xlsx [file jitc-2020-001071supp010_data_supplement.xlsx]

## Sheet: Flow_cytrometry
Supplementary Table 4. Flow cytometry phenotypic analysis of PDA patients’ T lymphocyte before and after CT.
		Before CT			After I CT			After II CT
PT	TAA	CD8	Treg	ratio	CD8	Treg	ratio	CD8	Treg	ratio
5	ENO1	16.5	9.4	1.8	14.2	5.2	2.7	nd	nd	nd
5	FUBP1	17.3	6.2	2.8	15	3.6	4.2	nd	nd	nd
5	K2C8	15.9	5	3.2	11.9	2.3	5.1	nd	nd	nd
9	FUBP1	6.8	3.3	2.1	17.9	4.9	3.6	19.6	2.7	7.2
9	G3P	8.3	4	2.1	nd	nd	nd	19	3.2	5.9
9	K2C8	8.7	2.9	3	19.3	5	3.9	17.3	2.1	8.1
25	FUBP1	16.1	3.9	4.2	18	2.5	7.4	17.6	1	17.7
27	ENO1	8.9	0.9	9.5	9.6	1.2	8	nd	nd	nd
27	FUBP1	9.6	1.1	9	13.8	1.1	13.1	nd	nd	nd
27	K2C8	6.8	1.7	4.1	8.7	1.1	7.6	nd	nd	nd
87	ENO1	6.1	3.8	1.6	nd	nd	nd	6	1.1	5.6
87	FUBP1	6.5	3.4	1.9	nd	nd	nd	9	0.8	12
Mean		10.6	3.8	3.8	14.3	3	6.2	14.8	1.8	9.4
SEM		1.3	0.7	0.8	1.2	0.6	1.1	2.3	0.4	1.9
PBMC from 5 PDA patients were stimulated with ENO1, G3P, K2C8 and FUBP1 before, after one and two CT rounds. The percentage of CD8+ T lymphocytes and CD4+FOXP3+ T lymphocytes (Treg) on PBMC were analyzed. The proportion of this two population was represented with the ratio between them (CD8/Treg).
