# Supplementary figures and images for: In pancreatic cancer, chemotherapy increases antitumor responses to tumor-associated antigens and potentiates DNA vaccination
Source: PubMed Central journal article supplement — J Immunother Cancer. 2020 Oct 28;8(2):e001071. doi: 10.1136/jitc-2020-001071 (PMC7594541; doi:10.1136/jitc-2020-001071), 2020-10-28

**A**

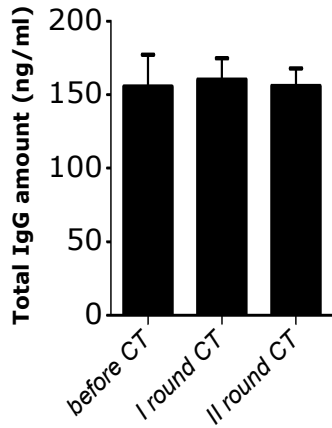

**B**

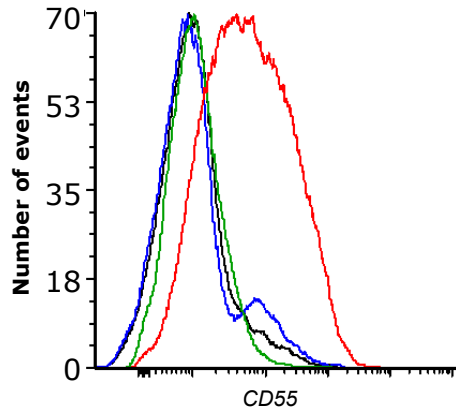

**C**

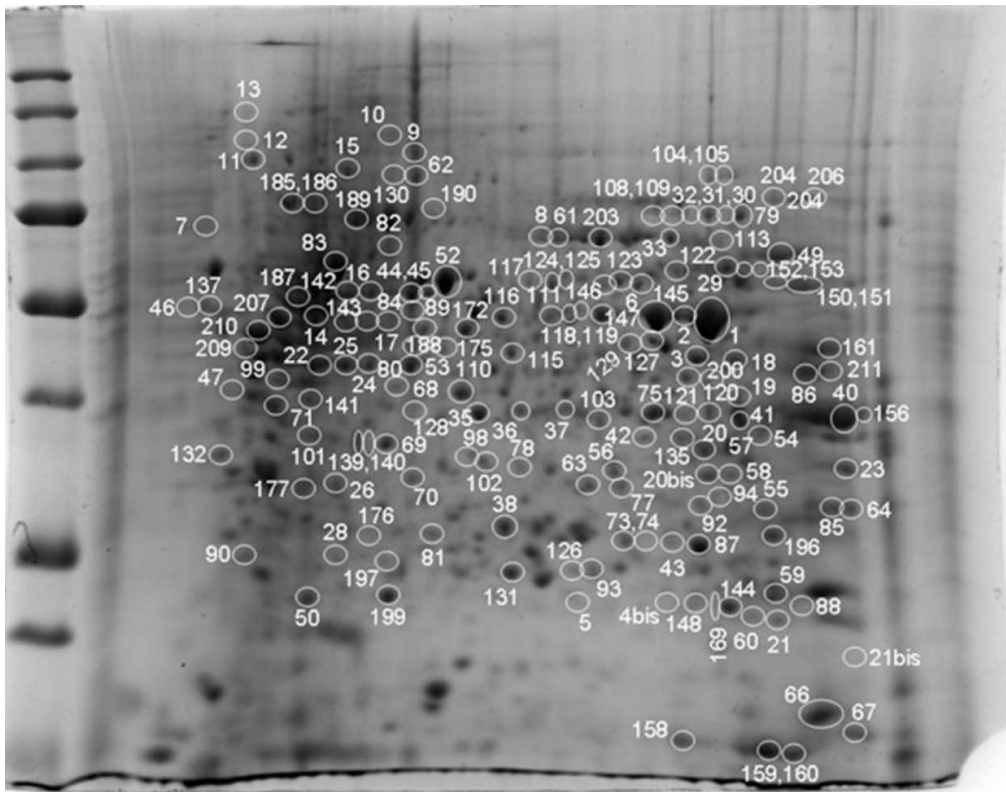

**D**

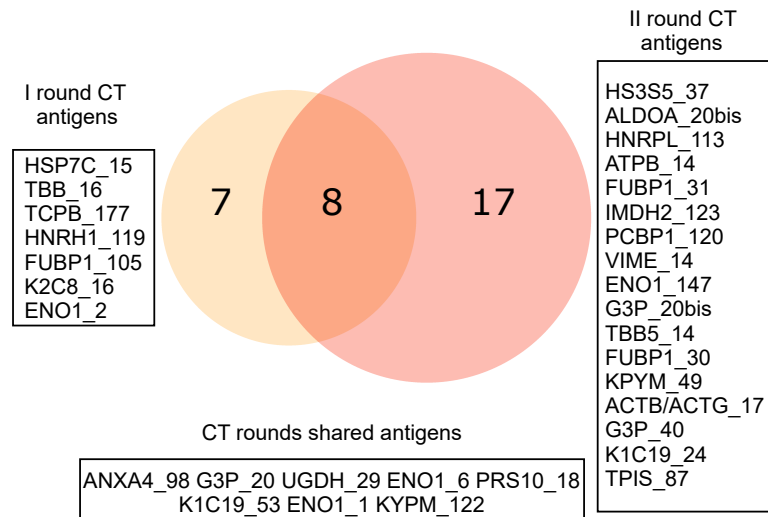

Supplement: jitc-2020-001071supp003.pdf [file jitc-2020-001071supp003.pdf]

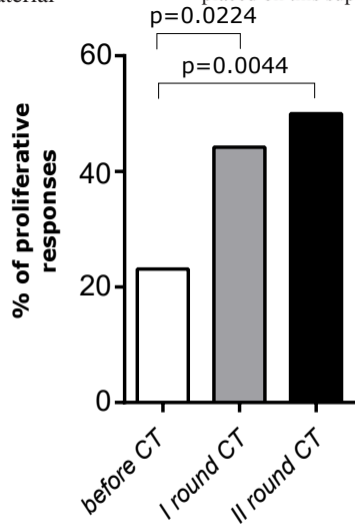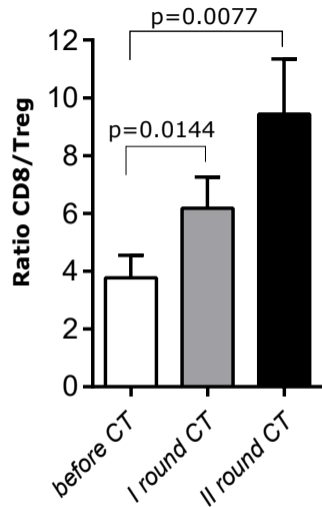

Supplement: jitc-2020-001071supp009.pdf [file jitc-2020-001071supp009.pdf]

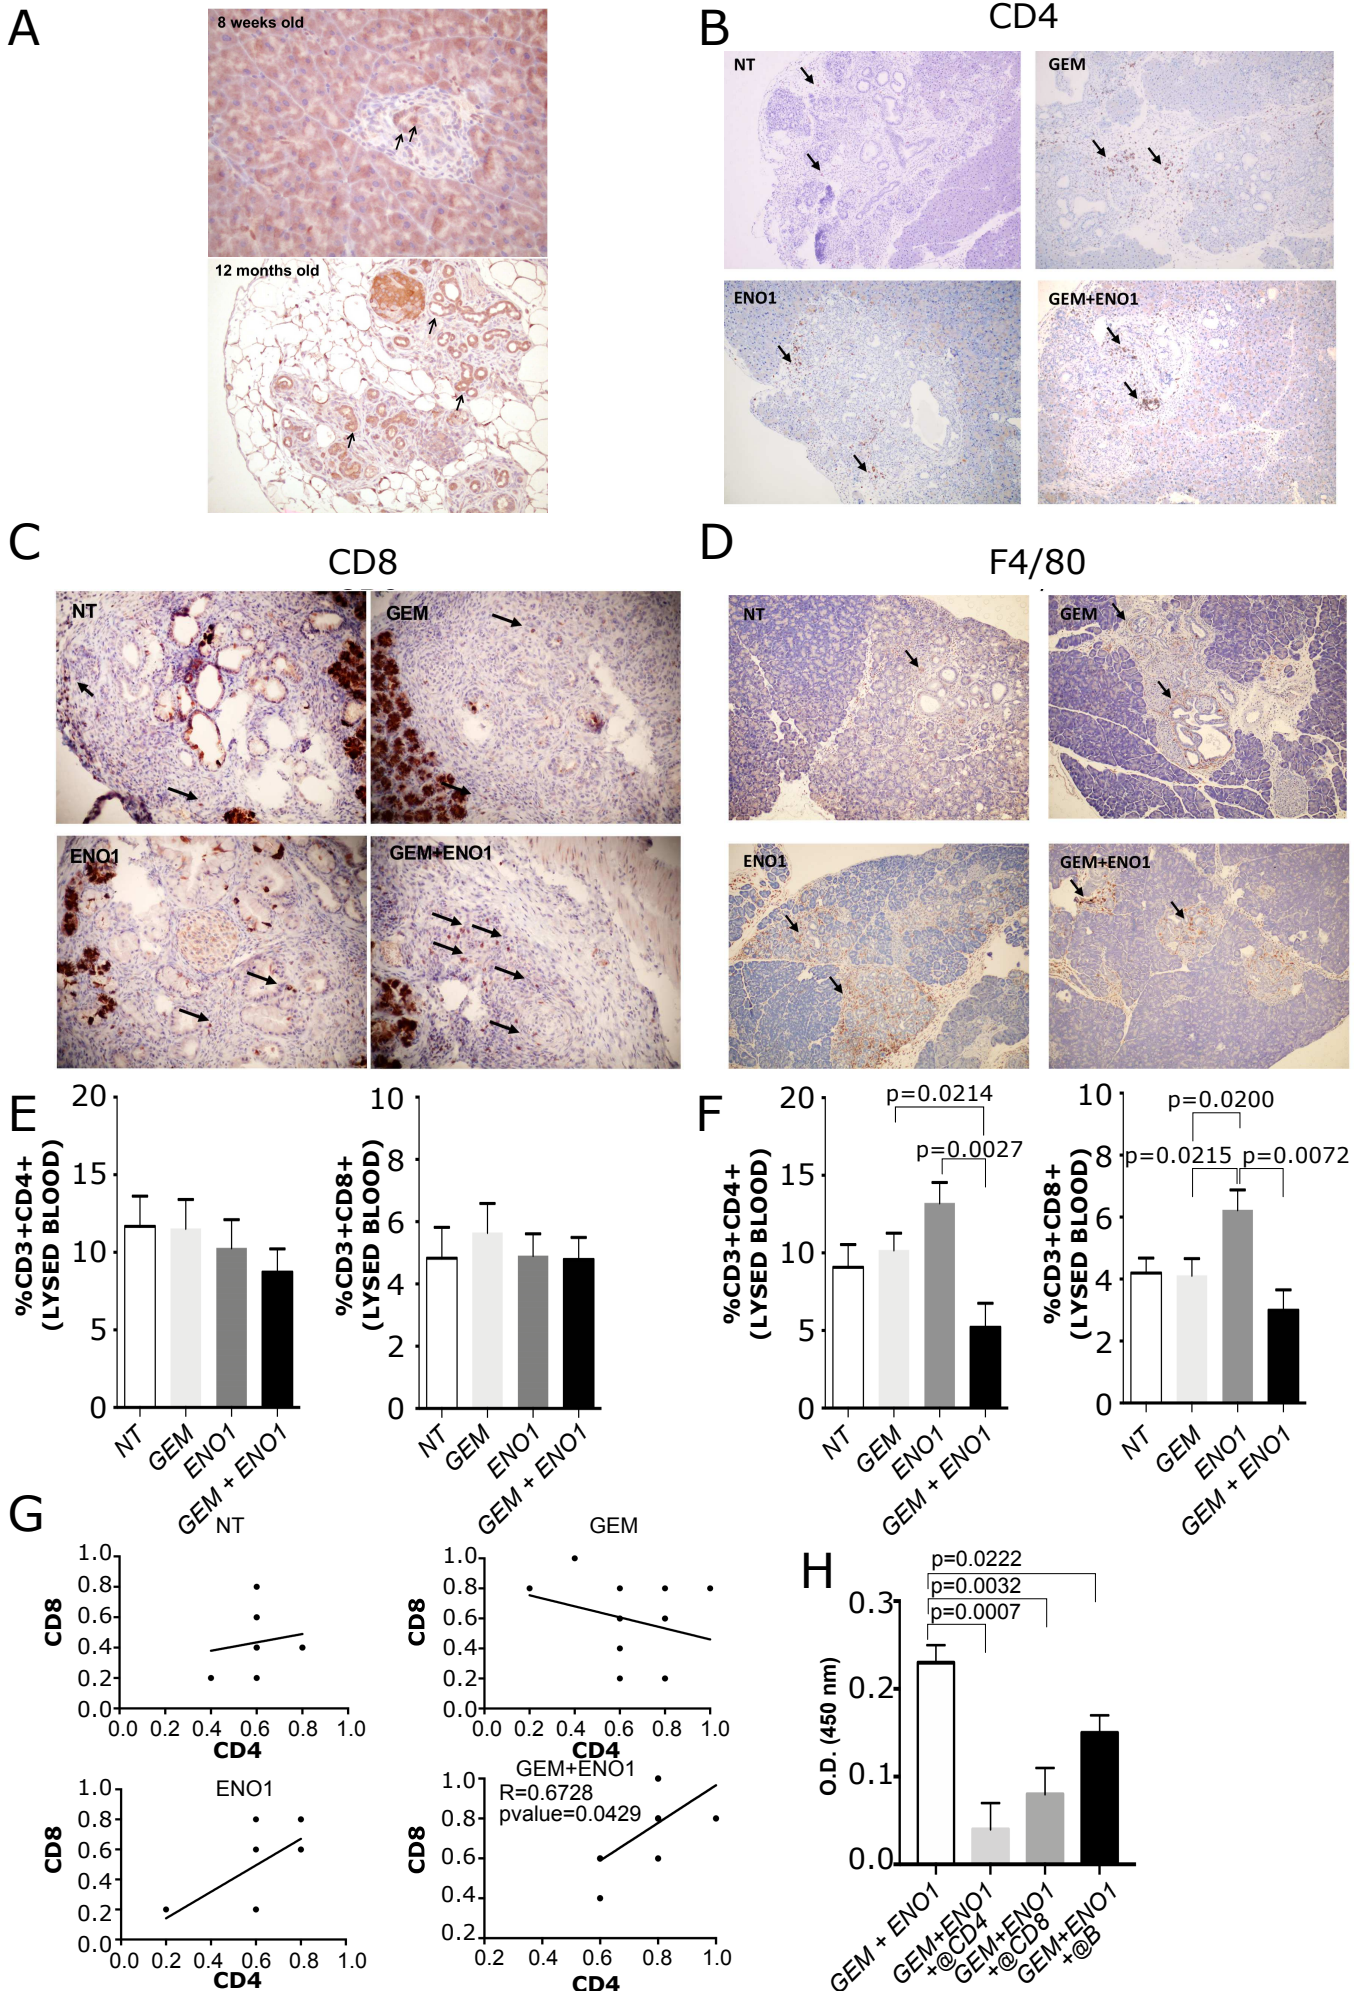

Supplement: jitc-2020-001071supp011.pdf [file jitc-2020-001071supp011.pdf]

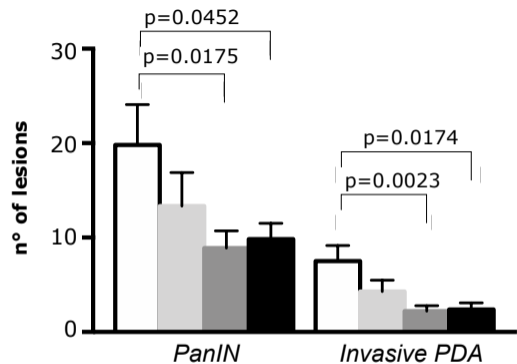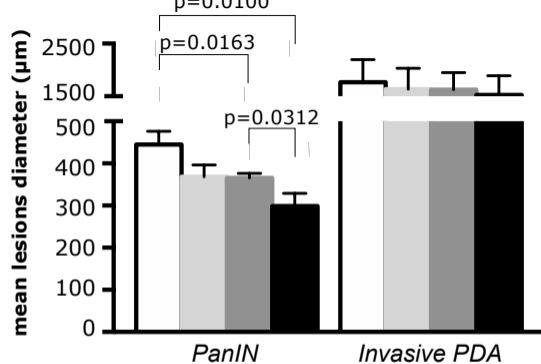

Supplement: jitc-2020-001071supp012.pdf [file jitc-2020-001071supp012.pdf]
